# Supplementary material for: Human fetoplacental arterial and venous endothelial cells are differentially programmed by gestational diabetes mellitus, resulting in cell-specific barrier function changes
Source: Springer Nature journal article supplement (doi:10.1007/s00125-018-4699-7), 2018-08-08
Supplement: MOESM1 [file 16020766]

## **Electronic Supplemental Material**

**providing detailed information on quality control of methylation  
and gene expression arrays, and additional, alternative  
representations of data**

**to**

### **Human Feto-Placental Arterial and Venous Endothelial Cells Are Differentially Programmed by Gestational Diabetes Mellitus Resulting in Cell-Specific Barrier Function Changes**

Silvija Cvitic<sup>1</sup>, Boris Novakovic<sup>2</sup>, Lavinia Gordon<sup>2</sup>, Christine M Ulz<sup>1</sup>, Magdalena Mühlberger<sup>1</sup>, Francisca I Diaz-Perez<sup>1</sup>, Jihoon E Joo<sup>2</sup>, Vendula Svendova<sup>3</sup>, Michael G Schimek<sup>3</sup>, Slave Trajanoski<sup>4</sup>, Richard Saffery<sup>2</sup>, Gernot Desoye<sup>1\*</sup> and Ursula Hiden<sup>1\*</sup>

<sup>1</sup>Department of Obstetrics and Gynecology, Medical University of Graz, Austria

<sup>2</sup>Cancer and Disease Epigenetics, Murdoch Children's Research Institute, Royal Children's Hospital, Melbourne, Australia

<sup>3</sup>Center for Medical Research, Medical University of Graz, Graz, Austria

<sup>4</sup>Institute for Medical Informatics, Statistics and Documentation, Medical University of Graz, Austria

\*The authors contributed equally to this work.

Corresponding author: Ursula Hiden

Medical University of Graz, Department of Obstetrics and Gynecology, Auenbruggerplatz 14,  
8036 Graz, Austria

E-mail: ursula.hiden@medunigraz.at

Phone: 0043-316-385-17837

## ESM Methods

### Quality control and control of the inter-array variability of the Illumina DNA methylation arrays

Quality control was carried out using the Bioconductor packages `arrayQualityMetrics`, `limma` and `MissMethyl`. Based on the results of the quality control and clustering analysis (ESM Fig. 1), sample dAEC\_6 was identified as an outlier and was excluded from further analysis. In the cluster dendrogram four venous samples, dVEC\_2, VEC\_10, dVEC\_3 and VEC\_8, clustered separately forming an individual group, but as they passed all quality control tests they were included in sequent analyses.

To control for inter-array variability four technical replicates of sample dVEC\_4 were used and compared pairwise. Technical replicates grouped appropriately in the clustering analysis and showed very good correlations in pairwise comparison scatter plots (ESM Fig. 2). For further analysis one randomly selected replicate was used.

### Validation of DNA methylation analysis: Locus-specific DNA methylation

Illumina Infinium Human Methylation450 (HM450) DNA methylation platform was validated using locus-specific SEQUENOM MassARRAY EpiTYPER platform. Genes for validation were chosen based on the methylation change between normal and diabetic cells ( $\Delta\beta$ ) and the size of the differentially methylated region (number of differentially methylated adjacent CpGs). Primer pairs for amplification were designed using EpiDesigner Web tool (<http://www.epidesigner.com/>). The regions of the respective genes were targeted using the following primers: forward 5' aggaagagagTTGTAATTAAGGTTGGGTGTGTTTT 3' and reverse 5' cagtaatacactcactatagggagaaggctATTCAAACCTCAAATCCTACCCTC 3' for nitric oxide synthase trafficker (*NOSTRIN*), forward 5' aggaagagagAGGAGGGTTTTTTGGTTATTTTTTTT 3' and reverse 5' cagtaatacactcactatagggagaaggctAAATACCACAACCCCATTTTAC 3' for caveolin 2 (*CAV2*), 5' aggaagagagTTTATTTGGATGTTGAAGGAATTTT 3' and reverse 5' cagtaatacactcactatagggagaaggctTTCTCAAATAAACCAATACAAACC 3' for DEAD (Asp-Glu-Ala-Asp) box polypeptide 60-like (*DDX60L*), forward 5' aggaagagagGTGAATTTTTTTTTGTGGGAATAATG 3' and reverse 5' cagtaatacactcactatagggagaaggctACTAAAAACTCTCTCCCCAACCTA 3' for natriuretic peptide C (*NPPC*). Amplification was performed after bisulfite conversion of genomic DNA with the MethylEasyXceed bisulphite conversion kit (Human Genetic Signatures, North

Ryde, Australia). Amplification conditions were 40 cycles of 95°C for 5min, 56°C for 1min 30s and 72°C for 1 min 30s, and then 72°C for 7min.

Significant difference in methylation of one CpG within *CAV2* and one within *NPPC* gene investigated with HM450 was confirmed with MassARRAY system (ESM Fig. 5b and 5d). Although *NOSTRIN* and *DDX60L* did not show a significant methylation change with MassARRAY system in the CpGs that are in common with the HM450, the average methylation change in the respective gene region was significantly altered in GDM exposed cells (ESM Fig. 5a and 5c). Furthermore, methylation status of *NOSTRIN* and *CAV2* genes for AEC and *DDX60L* and *NPPC* genes for VEC obtained with HM450 significantly correlated with the methylation data from MassARRAY system thereby validating the HM450 platform (ESM Fig. 5e and 5f).

### **Advantages and Disadvantages of HM450K Illumina DNA methylation arrays**

Genome-wide DNA methylation analysis always involves a trade-off between coverage and depth [1]. The 450K array covers most ENCODE assigned distal regulatory regions and gene promoters, however it covers a very small percentage of all CpG sites in the genome. Techniques like enhanced reduced representation bisulfite sequencing (ERRBS) and whole genome bisulfite sequencing (WGBS) cover a markedly higher number of CpG sites. In our study we expected small differences in DNA methylation, and therefore, chose a technique that is reasonably quantitative and more cost-effective. Future studies can consider more global screening approaches such as EPIC array (850K), ERRBS, or WGBS that offer more coverage and therefore provide information about CpG sites that are not covered by the 450K array [2].

### **References**

- [1] Laird PW (2010) Principles and challenges of genomewide DNA methylation analysis. *Nat Rev Genet* 11: 191-203
- [2] Pidsley R, Zotenko E, Peters TJ, et al. (2016) Critical evaluation of the Illumina MethylationEPIC BeadChip microarray for whole-genome DNA methylation profiling. *Genome Biol* 17: 208

**ESM Table 1.** Genes comprising differentially methylated CpGs that revealed correlation in co-variate analysis testing. Testing was performed for gestational age, cord blood insulin, fetal weight and length, fetal ponderal index, placental weight, maternal CRP, maternal height, maternal weight and BMI before pregnancy and before birth.

| <b>Clinical parameter</b> | <b>No of CpGs</b> | <b>Genes</b>                                               |
|---------------------------|-------------------|------------------------------------------------------------|
| Maternal CRP              | 3                 | <i>BRD9, MICAL2</i>                                        |
| Fetal ponderal index      | 8                 | <i>SNTB1, DEAF1, FGGY, ROR1, PKLR, VPS4A</i>               |
| Fetal gender              | 8                 | <i>RFTN1, CSMD1, ALG11, UTP14C, DAZL, TAPBP</i>            |
| Gestational age           | 8                 | <i>TUBA3E, PLEKHA7, LCN10, TNIP3, SEPT9, CARTPT, MYCBP</i> |

No correlation was identified with cord blood insulin, fetal weight and length, placental weight, maternal height, maternal weight and BMI before pregnancy and before birth, and gestational weight gain.

**ESM Table 2.** Identification of differentially methylated regions (DMRs) with two or more differentially methylated positions (DMPs) in VEC vs sVEC (upper panel) and AEC vs dAEC (lower panel).

| <b>Differential methylated CpGs in GDM exposed AEC</b> |                        |                         |                                                      |                      |                                              |
|--------------------------------------------------------|------------------------|-------------------------|------------------------------------------------------|----------------------|----------------------------------------------|
| <b>Gene symbol</b>                                     | <b>AEC methylation</b> | <b>dAEC methylation</b> | <b>Methylation change (<math>\Delta\beta</math>)</b> | <b>DMR size (bp)</b> | <b>No. of differentially methylated CpGs</b> |
| <i>PRDM9</i>                                           | 0.365                  | 0.126                   | -0.240                                               | 206                  | 7                                            |
| <i>SAMD11</i>                                          | 0.598                  | 0.390                   | -0.208                                               | 631                  | 5                                            |
| <i>CECR2</i>                                           | 0.467                  | 0.177                   | -0.289                                               | 188                  | 5                                            |
| <i>CRTAC1</i>                                          | 0.700                  | 0.415                   | -0.286                                               | 1052                 | 4                                            |
| <i>CUX2</i>                                            | 0.746                  | 0.486                   | -0.260                                               | 478                  | 4                                            |
| <i>HMHA1</i>                                           | 0.655                  | 0.399                   | -0.256                                               | 377                  | 4                                            |
| <i>VPS53</i>                                           | 0.636                  | 0.299                   | -0.337                                               | 252                  | 4                                            |
| <i>UPP1</i>                                            | 0.580                  | 0.869                   | 0.289                                                | 178                  | 4                                            |
| <i>MEIS2</i>                                           | 0.682                  | 0.401                   | -0.281                                               | 145                  | 4                                            |
| <i>TRIM60</i>                                          | 0.707                  | 0.408                   | -0.299                                               | 107                  | 4                                            |
| <i>ZNF846</i>                                          | 0.865                  | 0.519                   | -0.346                                               | 434                  | 3                                            |
| <i>CD1D</i>                                            | 0.425                  | 0.179                   | -0.246                                               | 403                  | 3                                            |
| <i>ABCA13</i>                                          | 0.472                  | 0.159                   | -0.312                                               | 363                  | 3                                            |
| <i>JAG2</i>                                            | 0.573                  | 0.810                   | 0.237                                                | 307                  | 3                                            |
| <i>ESYT3</i>                                           | 0.141                  | 0.422                   | 0.281                                                | 290                  | 3                                            |
| <i>ZFP57</i>                                           | 0.381                  | 0.326                   | -0.055                                               | 288                  | 3                                            |
| <i>AKAP10</i>                                          | 0.191                  | 0.475                   | 0.284                                                | 276                  | 3                                            |
| <i>RBM46</i>                                           | 0.527                  | 0.287                   | -0.240                                               | 269                  | 3                                            |
| <i>PNLDC1</i>                                          | 0.778                  | 0.542                   | -0.236                                               | 228                  | 3                                            |
| <i>ZFP42</i>                                           | 0.503                  | 0.226                   | -0.276                                               | 224                  | 3                                            |
| <i>DPYSL3</i>                                          | 0.505                  | 0.795                   | 0.290                                                | 220                  | 3                                            |
| <i>PIWIL3</i>                                          | 0.649                  | 0.322                   | -0.327                                               | 219                  | 3                                            |
| <i>ATP6V1B1</i>                                        | 0.319                  | 0.579                   | 0.260                                                | 218                  | 3                                            |
| <i>SERP1</i>                                           | 0.695                  | 0.360                   | -0.335                                               | 206                  | 3                                            |
| <i>SLC6A1</i>                                          | 0.690                  | 0.331                   | -0.360                                               | 200                  | 3                                            |
| <i>FLJ42875</i>                                        | 0.627                  | 0.890                   | 0.263                                                | 199                  | 3                                            |
| <i>CACNB2</i>                                          | 0.527                  | 0.273                   | -0.254                                               | 180                  | 3                                            |
| <i>DIO3</i>                                            | 0.645                  | 0.274                   | -0.371                                               | 112                  | 3                                            |
| <i>GSTA4</i>                                           | 0.421                  | 0.721                   | 0.300                                                | 109                  | 3                                            |
| <i>HLA-DRB5</i>                                        | 0.311                  | 0.543                   | 0.232                                                | 290                  | 2                                            |
| <i>AFF3</i>                                            | 0.441                  | 0.180                   | -0.261                                               | 278                  | 2                                            |
| <i>HTATIP2</i>                                         | 0.374                  | 0.630                   | 0.257                                                | 266                  | 2                                            |
| <i>LRBA</i>                                            | 0.520                  | 0.773                   | 0.253                                                | 263                  | 2                                            |
| <i>FAM150B</i>                                         | 0.564                  | 0.256                   | -0.309                                               | 252                  | 2                                            |
| <i>UMODL1</i>                                          | 0.626                  | 0.412                   | -0.215                                               | 246                  | 2                                            |
| <i>HSPA2</i>                                           | 0.409                  | 0.680                   | 0.271                                                | 240                  | 2                                            |
| <i>CBX5</i>                                            | 0.298                  | 0.615                   | 0.316                                                | 232                  | 2                                            |
| <i>NAVI</i>                                            | 0.168                  | 0.415                   | 0.247                                                | 230                  | 2                                            |
| <i>IRF5</i>                                            | 0.398                  | 0.638                   | 0.241                                                | 226                  | 2                                            |
| <i>AGBL1</i>                                           | 0.384                  | 0.173                   | -0.211                                               | 219                  | 2                                            |
| <i>KLK15</i>                                           | 0.539                  | 0.263                   | -0.276                                               | 204                  | 2                                            |

|                  |       |       |        |     |   |
|------------------|-------|-------|--------|-----|---|
| <i>FLII</i>      | 0.660 | 0.904 | 0.244  | 203 | 2 |
| <i>KPRP</i>      | 0.720 | 0.455 | -0.265 | 195 | 2 |
| <i>NRN1</i>      | 0.480 | 0.183 | -0.297 | 191 | 2 |
| <i>FAM101A</i>   | 0.309 | 0.629 | 0.320  | 185 | 2 |
| <i>CHLI</i>      | 0.360 | 0.119 | -0.241 | 179 | 2 |
| <i>GATA3</i>     | 0.589 | 0.847 | 0.258  | 164 | 2 |
| <i>VWA3B</i>     | 0.477 | 0.220 | -0.257 | 160 | 2 |
| <i>FRMD4A</i>    | 0.378 | 0.165 | -0.213 | 159 | 2 |
| <i>NLGN1</i>     | 0.309 | 0.554 | 0.244  | 154 | 2 |
| <i>CTNNA2</i>    | 0.476 | 0.185 | -0.291 | 146 | 2 |
| <i>AHNAK</i>     | 0.410 | 0.729 | 0.319  | 144 | 2 |
| <i>NKX6-2</i>    | 0.268 | 0.520 | 0.251  | 144 | 2 |
| <i>ZFPM1</i>     | 0.457 | 0.770 | 0.313  | 119 | 2 |
| <i>COL21A1</i>   | 0.348 | 0.612 | 0.264  | 116 | 2 |
| <i>NPHS2</i>     | 0.648 | 0.417 | -0.231 | 108 | 2 |
| <i>VAX2</i>      | 0.584 | 0.874 | 0.290  | 106 | 2 |
| <i>NQO2</i>      | 0.430 | 0.648 | 0.218  | 100 | 2 |
| <i>EIF5A2</i>    | 0.362 | 0.122 | -0.240 | 97  | 2 |
| <i>CD300A</i>    | 0.200 | 0.428 | 0.229  | 96  | 2 |
| <i>FAAH</i>      | 0.679 | 0.415 | -0.265 | 94  | 2 |
| <i>ACADM</i>     | 0.357 | 0.122 | -0.235 | 94  | 2 |
| <i>ZNF836</i>    | 0.292 | 0.620 | 0.328  | 90  | 2 |
| <i>SHOX2</i>     | 0.288 | 0.309 | 0.021  | 90  | 2 |
| <i>RAI1</i>      | 0.478 | 0.727 | 0.249  | 88  | 2 |
| <i>SOX6</i>      | 0.508 | 0.791 | 0.283  | 87  | 2 |
| <i>HPGD</i>      | 0.488 | 0.257 | -0.231 | 87  | 2 |
| <i>GLRX3</i>     | 0.684 | 0.435 | -0.249 | 84  | 2 |
| <i>LHPP</i>      | 0.482 | 0.715 | 0.233  | 81  | 2 |
| <i>SORL1</i>     | 0.626 | 0.372 | -0.253 | 81  | 2 |
| <i>CCNG2</i>     | 0.619 | 0.347 | -0.272 | 77  | 2 |
| <i>GRAMD1B</i>   | 0.327 | 0.080 | -0.248 | 77  | 2 |
| <i>CASZ1</i>     | 0.274 | 0.608 | 0.335  | 75  | 2 |
| <i>FBXO4</i>     | 0.720 | 0.279 | -0.440 | 65  | 2 |
| <i>DES</i>       | 0.293 | 0.519 | 0.226  | 63  | 2 |
| <i>PTPRN2</i>    | 0.439 | 0.715 | 0.276  | 60  | 2 |
| <i>BRDT</i>      | 0.897 | 0.676 | -0.221 | 60  | 2 |
| <i>NXN</i>       | 0.454 | 0.712 | 0.258  | 58  | 2 |
| <i>FAM20B</i>    | 0.687 | 0.485 | -0.203 | 58  | 2 |
| <i>C10orf108</i> | 0.573 | 0.251 | -0.322 | 56  | 2 |
| <i>DPEP1</i>     | 0.495 | 0.251 | -0.244 | 54  | 2 |
| <i>ATP4B</i>     | 0.448 | 0.201 | -0.246 | 54  | 2 |
| <i>PTPRN2</i>    | 0.773 | 0.553 | -0.220 | 52  | 2 |
| <i>CTSF</i>      | 0.212 | 0.465 | 0.253  | 49  | 2 |
| <i>ADCY7</i>     | 0.562 | 0.785 | 0.223  | 46  | 2 |
| <i>SDR16C5</i>   | 0.609 | 0.389 | -0.219 | 45  | 2 |
| <i>RTP1</i>      | 0.384 | 0.157 | -0.227 | 43  | 2 |
| <i>CAMTA1</i>    | 0.502 | 0.806 | 0.305  | 42  | 2 |
| <i>DHRS3</i>     | 0.163 | 0.407 | 0.244  | 42  | 2 |
| <i>SLCO1B3</i>   | 0.753 | 0.388 | -0.365 | 37  | 2 |

|                 |       |       |        |    |   |
|-----------------|-------|-------|--------|----|---|
| <i>ANGPT2</i>   | 0.243 | 0.511 | 0.268  | 36 | 2 |
| <i>PDGFRA</i>   | 0.249 | 0.453 | 0.203  | 34 | 2 |
| <i>TMEM232</i>  | 0.282 | 0.073 | -0.210 | 33 | 2 |
| <i>SPESP1</i>   | 0.476 | 0.223 | -0.253 | 30 | 2 |
| <i>HLA-DPB2</i> | 0.717 | 0.486 | -0.230 | 29 | 2 |
| <i>BTNL2</i>    | 0.642 | 0.337 | -0.305 | 29 | 2 |
| <i>RASL10B</i>  | 0.702 | 0.942 | 0.240  | 28 | 2 |
| <i>CDH12</i>    | 0.420 | 0.110 | -0.310 | 27 | 2 |
| <i>KCNA10</i>   | 0.489 | 0.220 | -0.270 | 22 | 2 |
| <i>LTBP1</i>    | 0.435 | 0.703 | 0.268  | 21 | 2 |
| <i>GALNT3</i>   | 0.382 | 0.667 | 0.285  | 21 | 2 |
| <i>DTNA</i>     | 0.524 | 0.152 | -0.372 | 21 | 2 |
| <i>EFCAB4B</i>  | 0.667 | 0.908 | 0.241  | 19 | 2 |
| <i>KIF26A</i>   | 0.617 | 0.390 | -0.227 | 18 | 2 |
| <i>CAVI</i>     | 0.272 | 0.524 | 0.252  | 17 | 2 |
| <i>BAIAP2</i>   | 0.279 | 0.519 | 0.240  | 17 | 2 |
| <i>RAP1GAP</i>  | 0.906 | 0.670 | -0.236 | 15 | 2 |
| <i>ODZ3</i>     | 0.786 | 0.522 | -0.264 | 13 | 2 |
| <i>PRHOXNB</i>  | 0.225 | 0.510 | 0.285  | 13 | 2 |
| <i>OCN</i>      | 0.719 | 0.466 | -0.254 | 13 | 2 |
| <i>PRAME</i>    | 0.670 | 0.383 | -0.287 | 13 | 2 |
| <i>TBX15</i>    | 0.494 | 0.703 | 0.209  | 12 | 2 |
| <i>HOXA4</i>    | 0.400 | 0.663 | 0.263  | 12 | 2 |
| <i>ESR1</i>     | 0.485 | 0.211 | -0.274 | 10 | 2 |
| <i>CXCL16</i>   | 0.237 | 0.488 | 0.251  | 9  | 2 |
| <i>CLU</i>      | 0.507 | 0.711 | 0.205  | 7  | 2 |
| <i>OTUB1</i>    | 0.504 | 0.230 | -0.274 | 7  | 2 |
| <i>RAPGEFL1</i> | 0.460 | 0.681 | 0.220  | 6  | 2 |
| <i>MSLNL</i>    | 0.834 | 0.556 | -0.278 | 5  | 2 |
| <i>NCOA6</i>    | 0.316 | 0.094 | -0.222 | 4  | 2 |
| <i>WNT4</i>     | 0.201 | 0.515 | 0.314  | 2  | 2 |
| <i>SV2B</i>     | 0.169 | 0.405 | 0.236  | 2  | 2 |
| <i>TAL1</i>     | 0.139 | 0.373 | 0.234  | 2  | 2 |

---

**Differential methylated CpGs in GDM exposed VEC**

---

| <b>Gene symbol</b> | <b>VEC methylation</b> | <b>dVEC methylation</b> | <b>Methylation change (<math>\Delta\beta</math>)</b> | <b>DMR size (bp)</b> | <b>No. of differentially methylated CpGs</b> |
|--------------------|------------------------|-------------------------|------------------------------------------------------|----------------------|----------------------------------------------|
| <i>DDX60L</i>      | 0.055                  | 0.300                   | 0.245                                                | 235                  | 5                                            |
| <i>ABAT</i>        | 0.518                  | 0.290                   | -0.227                                               | 512                  | 4                                            |
| <i>CCDC48</i>      | 0.521                  | 0.106                   | -0.415                                               | 110                  | 3                                            |
| <i>DPP6</i>        | 0.431                  | 0.759                   | 0.328                                                | 166                  | 3                                            |
| <i>ENPP2</i>       | 0.671                  | 0.387                   | -0.283                                               | 247                  | 3                                            |
| <i>GBX2</i>        | 0.318                  | 0.546                   | 0.227                                                | 568                  | 3                                            |
| <i>MAL2</i>        | 0.386                  | 0.702                   | 0.316                                                | 146                  | 3                                            |
| <i>MEIS1</i>       | 0.320                  | 0.562                   | 0.242                                                | 249                  | 3                                            |
| <i>ZBTB9</i>       | 0.589                  | 0.504                   | -0.085                                               | 170                  | 3                                            |
| <i>ATP4A</i>       | 0.396                  | 0.402                   | 0.006                                                | 62                   | 2                                            |
| <i>BLCAP</i>       | 0.802                  | 0.574                   | -0.227                                               | 52                   | 2                                            |
| <i>C1orf173</i>    | 0.387                  | 0.138                   | -0.249                                               | 91                   | 2                                            |

|                 |       |       |        |     |   |
|-----------------|-------|-------|--------|-----|---|
| <i>C3orf27</i>  | 0.299 | 0.525 | 0.225  | 7   | 2 |
| <i>C5orf47</i>  | 0.788 | 0.580 | -0.208 | 140 | 2 |
| <i>CDH20</i>    | 0.840 | 0.577 | -0.263 | 143 | 2 |
| <i>CR2</i>      | 0.675 | 0.457 | -0.218 | 149 | 2 |
| <i>GALNACT1</i> | 0.464 | 0.246 | -0.219 | 46  | 2 |
| <i>CYP26A1</i>  | 0.558 | 0.277 | -0.281 | 181 | 2 |
| <i>FBXL18</i>   | 0.311 | 0.611 | 0.300  | 12  | 2 |
| <i>GLI3</i>     | 0.572 | 0.315 | -0.257 | 172 | 2 |
| <i>HAMP</i>     | 0.652 | 0.378 | -0.274 | 11  | 2 |
| <i>IFITM1</i>   | 0.133 | 0.336 | 0.203  | 180 | 2 |
| <i>IMPA2</i>    | 0.248 | 0.504 | 0.256  | 61  | 2 |
| <i>IZUMO1</i>   | 0.402 | 0.158 | -0.244 | 187 | 2 |
| <i>LHX9</i>     | 0.136 | 0.429 | 0.294  | 204 | 2 |
| <i>MIR196A2</i> | 0.686 | 0.389 | -0.297 | 9   | 2 |
| <i>NKX6-2</i>   | 0.512 | 0.298 | -0.214 | 6   | 2 |
| <i>PDE4D</i>    | 0.293 | 0.501 | 0.208  | 101 | 2 |
| <i>PIWIL2</i>   | 0.746 | 0.464 | -0.282 | 254 | 2 |
| <i>PLCB2</i>    | 0.653 | 0.411 | -0.243 | 14  | 2 |
| <i>RNF39</i>    | 0.801 | 0.556 | -0.244 | 209 | 2 |
| <i>SMOC2</i>    | 0.441 | 0.711 | 0.269  | 71  | 2 |
| <i>SNTG2</i>    | 0.636 | 0.341 | -0.295 | 77  | 2 |
| <i>TNN</i>      | 0.583 | 0.812 | 0.229  | 119 | 2 |
| <i>TNXB</i>     | 0.720 | 0.472 | -0.247 | 9   | 2 |
| <i>TRIM10</i>   | 0.269 | 0.579 | 0.310  | 28  | 2 |
| <i>TUB</i>      | 0.500 | 0.756 | 0.256  | 114 | 2 |
| <i>UCN3</i>     | 0.494 | 0.805 | 0.311  | 12  | 2 |
| <i>UTS2</i>     | 0.304 | 0.543 | 0.238  | 7   | 2 |
| <i>WNK4</i>     | 0.185 | 0.413 | 0.228  | 80  | 2 |
| <i>ZMYND10</i>  | 0.417 | 0.188 | -0.229 | 6   | 2 |



**ESM Table 3.** Maternal, neonatal and placental clinical parameters for Phalloidin stainings and ECIS monolayer impedance measurements.

|                            |                                                  | Actin organisation |             | Monolayer impedance |             |
|----------------------------|--------------------------------------------------|--------------------|-------------|---------------------|-------------|
|                            |                                                  | Normal             | GDM         | Normal              | GDM         |
| Maternal data              | Number of individual patients for cell isolation | 10                 | 9           | 12                  | 10          |
|                            | Number of cell isolations (AEC/VEC)              | 5/6                | 5/5         | 10/8                | 6/4         |
|                            | Maternal age (yrs)                               | 28.4±5.9           | 33.6±5.5    | 28.6±7.1            | 30.0±6.8    |
|                            | Gestational age (wks)                            | 38.6±1.1           | 39.0±0.9    | 40.0±1.6            | 39.1±0.9    |
|                            | Maternal height (m)                              | 1.66±0.06          | 1.67±0.04   | 1.68±0.07           | 1.62±0.07   |
|                            | Weight before pregnancy (kg)                     | 64.2±3.8           | 80.9±7.8*   | 70.6±12.3           | 70.9±25.1   |
|                            | BMI before pregnancy                             | 23.3±2.5           | 29.2±7.8*   | 24.8±3.8            | 26.8±8.5    |
|                            | Weight before birth (kg)                         | 71.8±7.3           | 87.8±12.2*  | 83.4±13.3           | 93.1±22.1   |
|                            | BMI before birth                                 | 26.5±3.7           | 31.7±12.2   | 30.5±3.5            | 34.6±6.5    |
|                            | Gestational weight gain (kg)                     | 7.3±7.5            | 6.9±8.0     | 15.2±4.1            | 9.0±11.0    |
|                            | CRP (nmol/l)                                     | 64±27              | 74±44       | 54±50               | 60±111      |
|                            | HbA1c (mmol/mol)                                 | n.d.               | 32.6±3.5    | n.d.                | 34.9±3.9    |
|                            | Fasting oGTT (mmol/l)                            | 4.43±0.32          | 4.41±0.21*  | 4.40±0.41           | 5.08±0.39*  |
|                            | 1h oGTT (mmol/l)                                 | 5.39±1.42          | 11.04±1.83* | 6.49±0.91           | 10.24±2.49* |
|                            | 2h oGTT (mmol/l)                                 | 4.88±0.49          | 6.49±14.71* | 5.33±0.72           | 7.04±1.92*  |
| GDM classification (A1/A2) |                                                  | 5/5                |             | 6/4                 |             |
| Neonatal data              | Offspring weight (g)                             | 3073±450           | 3388±243    | 3312±584            | 3260±308    |
|                            | Offspring length (cm)                            | 49.1±2.0           | 51.1±1.8*   | 49.6±2.0            | 49.7±1.8    |
|                            | Placental weight (g)                             | 602±195            | 621±146     | 637±222             | 620±109     |

|  |                               |           |           |           |           |
|--|-------------------------------|-----------|-----------|-----------|-----------|
|  | Fetal ponderal index          | 25.8±1.5  | 25.4±2.0  | 26.9±3.6  | 26.6±2.1  |
|  | Feto-placental weight ratio   | 5.35±1.49 | 5.54±1.04 | 5.36±2.42 | 5.28±0.67 |
|  | Cord blood insulin (pmol/l)   | n.d.      | 109±92    | n.d.      | 179±209   |
|  | Cord blood C-peptide (nmol/l) | n.d.      | 1.14±1.04 | n.d.      | 1.42±1.08 |
|  | Cell isolation passage        | 7.7±1.3   | 8.0±1.6   | 7.9±1.4   | 7.7±1.9   |

The ethnicity was similar in all groups. All isolation derived from female placentas.

Data are indicated as mean±SD.

\* p <0.05 by students t-test vs respective control group.

BMI = body mass index

CRP = C-reactive protein

HbA1c = glycosylated hemoglobin

oGTT= oral glucose tolerance test

n.d. = not determined

**ESM Table 4.** Validation of genes that were differentially expressed in GDM exposed AEC vs. control in the microarray analysis.

| Gene symbol    | Gene name                                     | Microarray |       | qPCR    |      |
|----------------|-----------------------------------------------|------------|-------|---------|------|
|                |                                               | p-value    | FC    | p-value | FC   |
| <i>VCAN</i>    | Versican                                      | <0.001     | 9.74  | <0.05   | 8.38 |
| <i>FBN1</i>    | Fibrillin 1                                   | <0.001     | 3.05  | <0.001  | 6.75 |
| <i>TGFBI</i>   | Transforming growth factor, beta-induced      | <0.001     | 2.84  | <0.05   | 2.42 |
| <i>CCND2</i>   | Cyclin D2                                     | 0.025      | 2.39  | <0.05   | 4.11 |
| <i>IGF1R</i>   | Insulin-like growth factor 1 receptor         | <0.001     | 1.67  | <0.05   | 2.38 |
| <i>GADD45B</i> | Growth arrest and DNA-damage-inducible, beta  | 0.001      | 1.35  | 0.063   | 1.95 |
| <i>p300</i>    | E1A binding protein p300                      | 0.001      | 1.28  | <0.001  | 3.57 |
| <i>GADD45A</i> | Growth arrest and DNA-damage-inducible, alpha | 0.04       | 1.18  | 0.067   | 1.80 |
| <i>FANCC</i>   | Fanconi anemia, complementation group C       | <0.001     | -1.31 | n.s.    | n.c. |

Genes, whose expression was significantly regulated by GDM by a variable fold, were selected for validation by qPCR. For calculation of  $2^{-\Delta\Delta ct}$  value, the geometrical mean of ct values of the housekeeping genes *RPL30* and *HPRT1* was used. All selected genes, except *GADD45A* (p=0.067), *GADD45B* (p=0.063) and *FANCC* (n.s.: not significant; n.c.: no change) reached statistical significance and were confirmed to be differentially expressed between control and GDM exposed cells, thus validating the microarray platform. FC (fold-change) is the ratio of mean expression for GDM exposed vs. control cells.

**ESM Fig. 1**

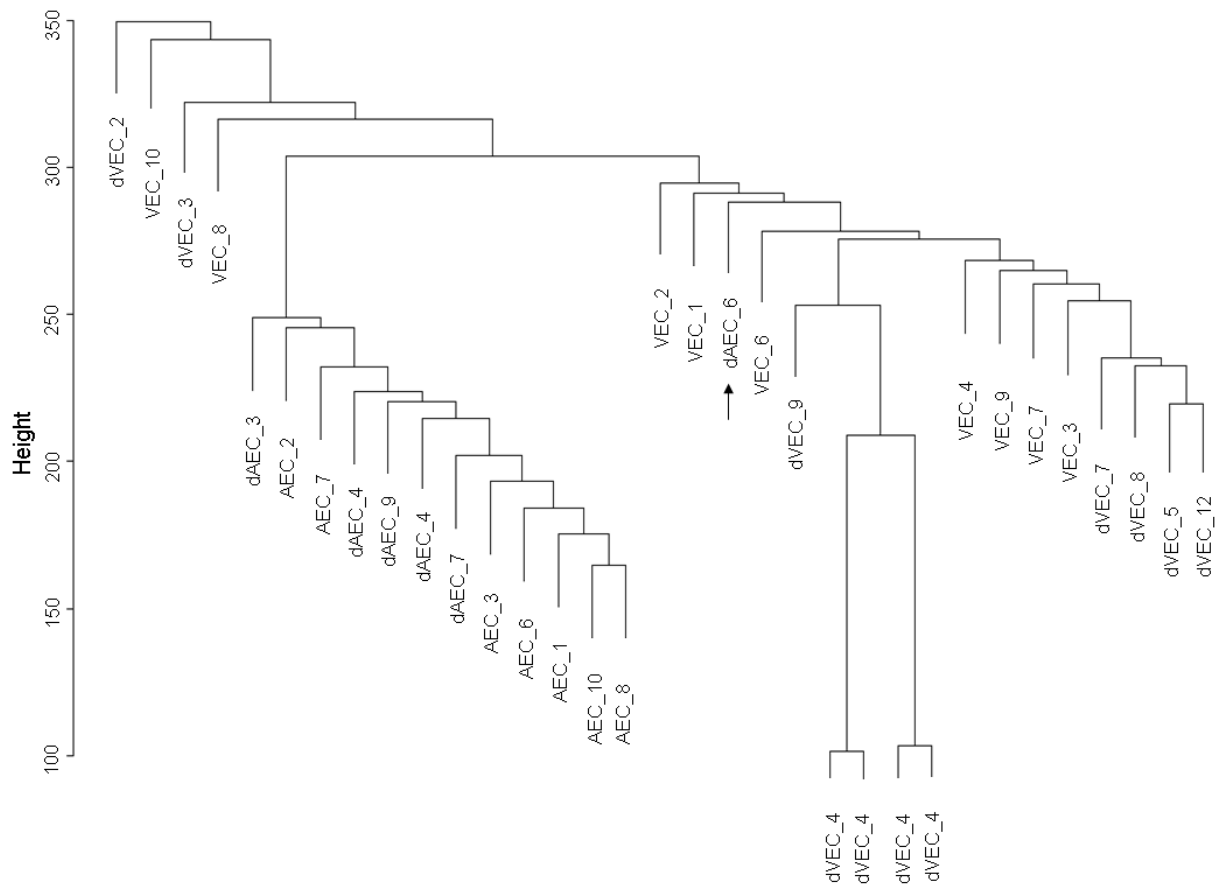

**ESM Figure 1.** Cluster dendrogram of methylation arrays showing influence of cell type and GDM on sample clustering. Arrow marks the arterial outlier sample dAEC\_6 that clusters with venous samples. Rectangle indicates four technical replicates of sample dVEC\_4 used to control for inter-array variability. Sample relations based on 426302 genes with  $SD/mean > 0.1$ .

ESM Fig. 2

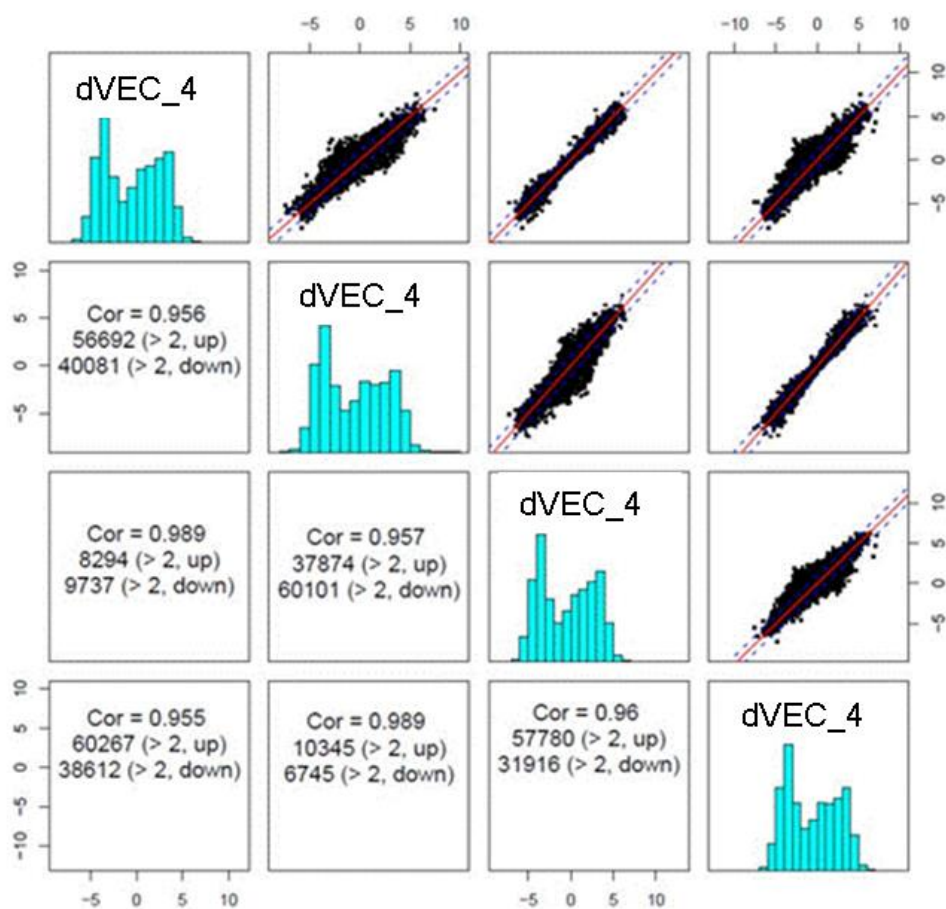

**ESM Figure 2.** Scatterplots of the four technical replicates of sample dVEC\_4 were used to control for inter-array variability. Pairwise comparison with sample correlation was performed on all investigated CpG probes.

**ESM Fig. 3**

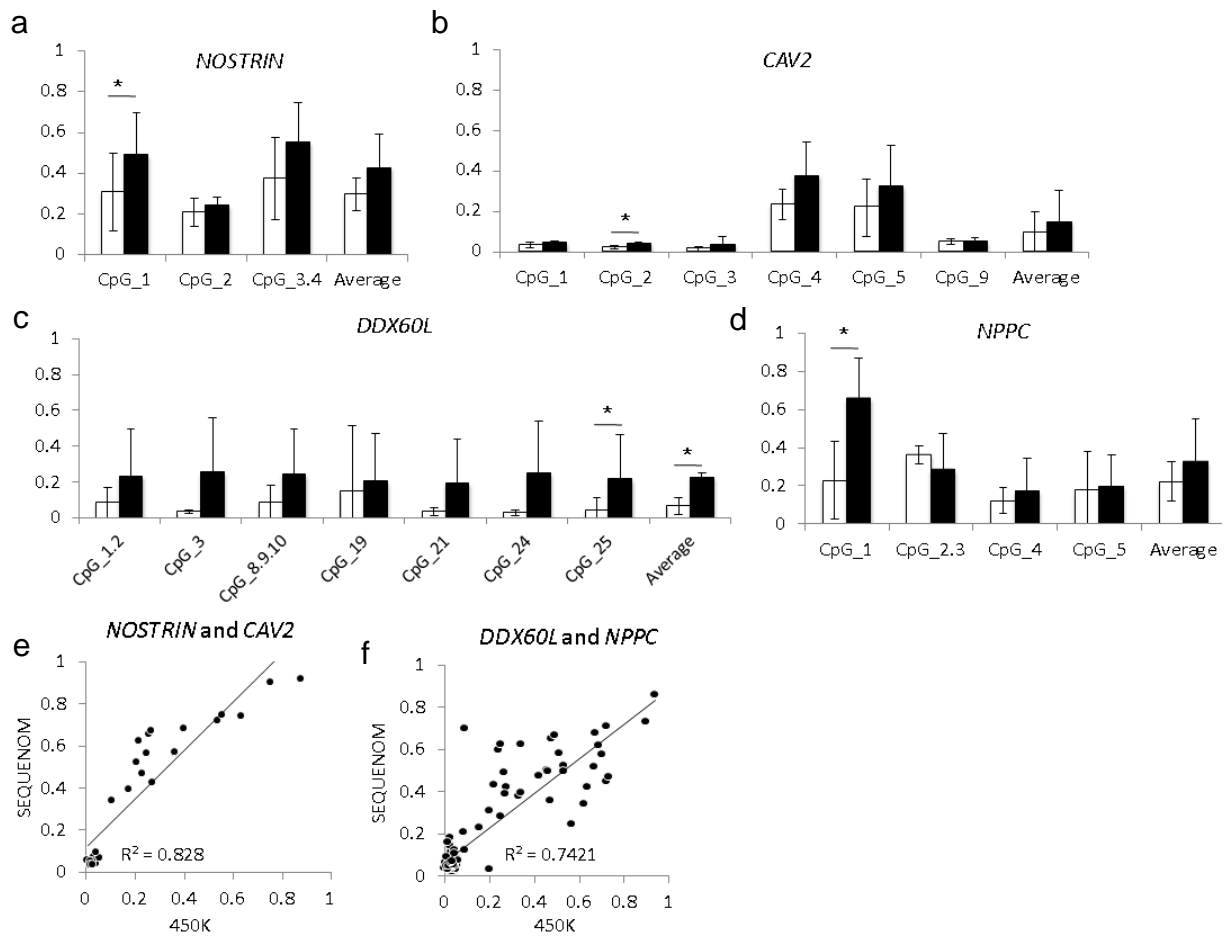

**ESM Figure 3.** Validation of Infinium HumanMethylation450 BeadChip arrays via MassARRAY system (SEQUENOM). *NOSTRIN* and *CAV2* were chosen for validation of methylation differences of AEC and *DDX60L* and *NPPC* of VEC exposed to GDM vs. control cells. Methylation status of individual CpGs from the MassARRAY measurement is shown. CpG2 and CpG3.4 for *NOSTRIN* (a), CpG2, CpG4, CpG5 and CpG9 for *CAV2* (b), CpG3, CpG21 and CpG25 *DDX60L* (c) and all shown CpGs for *NPPC* (d) are in common with the HM450. Methylation status of the chosen probes obtained with HM450 array significantly correlated ( $p < 0.05$ ) with the methylation data from Sequenom (e, f).

**ESM Fig. 4**

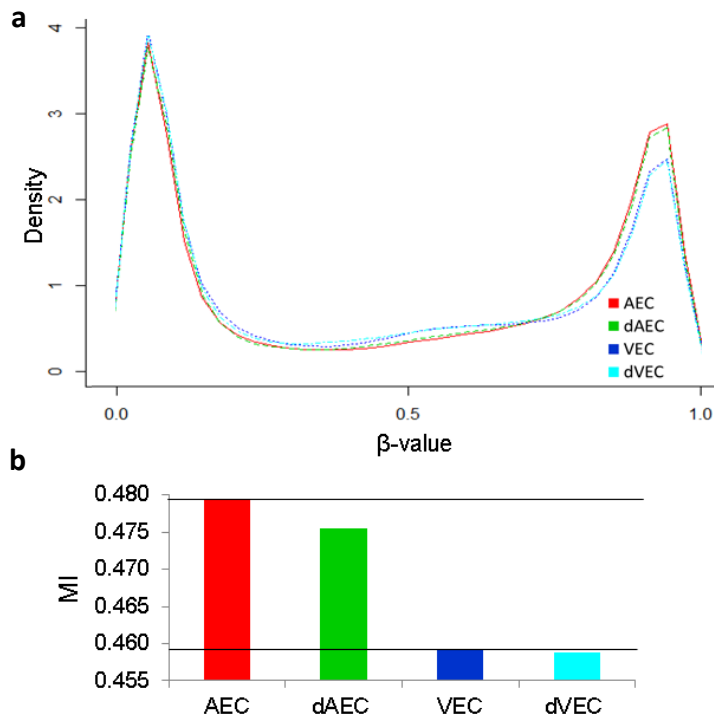

**ESM Figure 4.** (a) Kernel density plot representing the distribution of the averaged methylation values ( $\beta$ -values) of control and GDM exposed AEC and VEC, respectively. Kernel density plot showed typical bimodal distribution of  $\beta$ -values for both, controls and diabetic samples. (b) Methylation index (MI) was calculated for each group by calculating the mean of all Infinium  $\beta$ -values for that sample. The MIs were then grouped by cell type and disease.

**ESM Fig. 5**

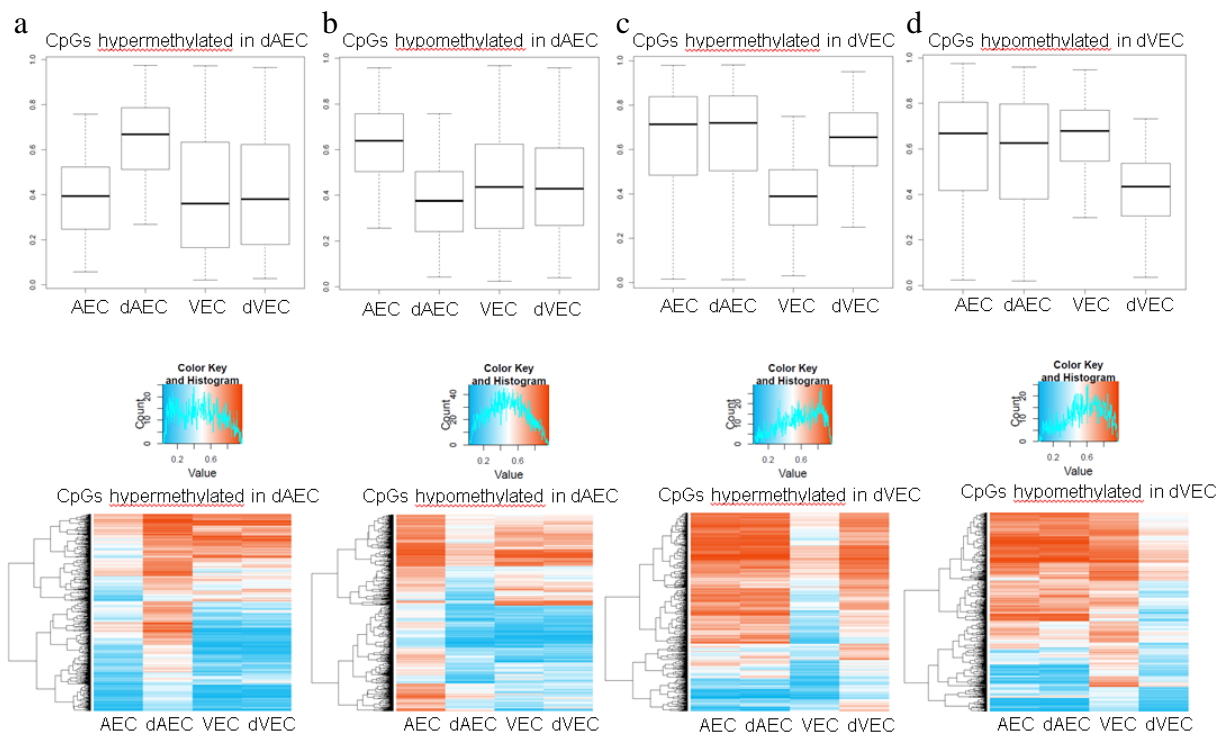

**ESM Figure 5.** Box plots and heat maps of methylation levels in control (AEC, VEC) and GDM exposed (dAEC, dVEC) fetoplacental endothelial cells. Methylation changes are represented as CpGs hypermethylated (a) and hypomethylated (b) in dAEC, and as CpGs hypermethylated (c) and hypomethylated (d) in dVEC.



ESM Fig. 6

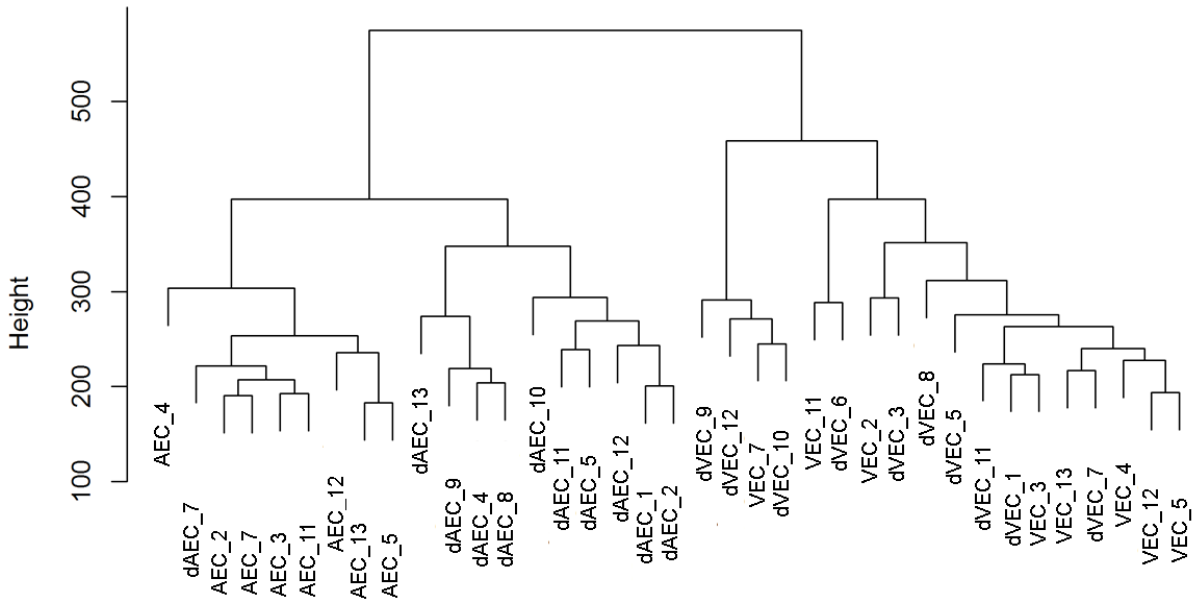

ESM Figure 6. Cluster dendrogram of expression arrays showing influence of cell type and GDM on sample clustering.
